# Supplementary material for: Duration of breastfeeding, age at introduction of complementary foods and allergy-related diseases: a prospective cohort study
Source: Springer Nature journal article supplement (doi:10.1186/s13006-020-00352-2), 2021-01-06
Supplement: MOESM1 [file 18741532]

# Additional File 1: Supplementary Tables

## For manuscript:

Duration of Breastfeeding, Age at Introduction of Solid Foods and Allergy Related Diseases: A Prospective Cohort Study

Louise Ekelund, Inga Gloppen, Torbjørn Øien, Melanie Rae Simpson

## Table of contents

|                                                                                                                                                                                       |   |
|---------------------------------------------------------------------------------------------------------------------------------------------------------------------------------------|---|
| Supplementary Table S1. Relationship between income and other common measures of socio-economic status or behaviours associated with socio-economic status .....                      | 2 |
| Supplementary Table S2. Characteristics of included participants, excluded participants and those lost to follow up.....                                                              | 3 |
| Supplementary Table S3. Breastfeeding duration versus age at introduction of complementary foods.....                                                                                 | 4 |
| Supplementary Table S4. Relation between breastfeeding duration and allergy related diseases when symptomatic children before six months of age are excluded .....                    | 5 |
| Supplementary Table S5. Relation between breastfeeding duration with maximum one year recall and allergy related diseases .....                                                       | 6 |
| Supplementary Table S6. Interaction between duration of breastfeeding and supplementary with infant formula and allergy related diseases.....                                         | 7 |
| Supplementary Table S7. Relation between age at introduction to complementary foods and allergy related diseases when symptomatic children before six months of age are excluded..... | 8 |
| Supplementary Table S8. Relation between breastfeeding / complementary food introduction overlap and allergy related diseases .....                                                   | 9 |

**Supplementary Table S1. Relationship between income and other common measures of socio-economic status or behaviours associated with socio-economic status**

|                                                    | n <sup>b</sup> | Total | Income quartiles based on estimated incomes <sup>a</sup> |      |      |      |
|----------------------------------------------------|----------------|-------|----------------------------------------------------------|------|------|------|
|                                                    |                |       | Q1                                                       | Q2   | Q3   | Q4   |
| <b>Maternal smoking<sup>c</sup>, %</b>             | 6727           | 19.5  | 24.5                                                     | 22.4 | 16.1 | 16.1 |
| <b>Paternal smoking<sup>c</sup>, %</b>             | 6395           | 21.9  | 27.8                                                     | 23.8 | 19.0 | 18.5 |
| <b>Maternal or paternal smoking<sup>c</sup>, %</b> | 6753           | 30.2  | 36.7                                                     | 33.3 | 26.1 | 26.0 |
| <b>Indoor smoking<sup>c</sup>, %</b>               | 6756           | 3.3   | 4.8                                                      | 4.2  | 2.2  | 2.2  |
| <b>Mothers education, years, mean</b>              | 3018           | 15.7  | 15.4                                                     | 15.2 | 16.0 | 15.8 |
| <b>Fathers education, years, mean</b>              | 2991           | 15.1  | 14.7                                                     | 14.6 | 15.4 | 15.4 |
| <b>Maternal age, years, mean</b>                   | 6771           | 29.9  | 29.3                                                     | 29.6 | 30.5 | 30.2 |
| <b>Homeownership<sup>c</sup>, %</b>                | 6790           | 89.2  | 82.6                                                     | 91.9 | 91.8 | 90.2 |
| <b>Family allergy, %</b>                           | 6773           | 73.6  | 71.5                                                     | 74.4 | 73.0 | 75.3 |

a: Income estimated based on average income in postcode of residence with participating families divided into quartiles.

b: The numbers vary because of missing data.

c: Smoking habits and homeownership at any time during the first two years of life.

**Supplementary Table S2. Characteristics of included participants, excluded participants and those lost to follow up.**

| Characteristics                                                               | Included participants<br>(n = 6802) |                | Excluded participants<br>(n = 3703) <sup>a</sup> |                | Lost to follow up<br>(n = 3094) <sup>b</sup> |                |
|-------------------------------------------------------------------------------|-------------------------------------|----------------|--------------------------------------------------|----------------|----------------------------------------------|----------------|
|                                                                               | n <sup>c</sup>                      |                | n <sup>c</sup>                                   |                | n <sup>c</sup>                               |                |
| <b>Duration of breastfeeding, months, mean (SD)</b>                           | 6795                                | 11.0 (5.7)     | 1345                                             | 8.9 (4.9)      | 3028                                         | 10.6 (5.6)     |
| <b>Breastfeeding ≥ 6 months, n (%)</b>                                        | 6796                                | 5695 (83.8)    | 1348                                             | 1010 (75.0)    | 3093                                         | 2560 (82.8)    |
| <b>Age at introduction to complementary foods, months, mean (SD)</b>          | 3814                                | 4.6 (1.3)      | 1254                                             | 4.5 (1.3)      | 1468                                         | 4.6 (1.2)      |
| <b>Introduced to solid foods ≥ 6 months of age, n (%)</b>                     | 3814                                | 996 (26.1)     | 1254                                             | 290 (23.1)     | 1468                                         | 352 (24.0)     |
| <b>Maternal age at birth, years, mean (SD)</b>                                | 6771                                | 29.9 (4.5)     | 2731                                             | 29.2 (4.7)     | 3076                                         | 29.5 (4.7)     |
| <b>Maternal education, n (%)</b>                                              | 3018                                |                | 886                                              |                | 869                                          |                |
| < 12 years (less than high school)                                            |                                     | 179 (5.9)      |                                                  | 68 (7.7)       |                                              | 54 (6.21)      |
| 12-16 years (up to 4 years University)                                        |                                     | 1535 (50.9)    |                                                  | 445 (50.2)     |                                              | 454 (52.2)     |
| > 16 years (more than 4 years University)                                     |                                     | 1304 (43.2)    |                                                  | 373 (42.1)     |                                              | 361 (41.5)     |
| <b>Mean income<sup>b</sup>, NOK, mean (SD)</b>                                | 6524                                | 254527 (29477) | 3298                                             | 250843 (32378) | 2913                                         | 251915 (30694) |
| <b>Family history of allergy<sup>c</sup>, n (%)</b>                           | 6773                                | 4987 (73.6)    | 3676                                             | 2467 (67.1)    | 3081                                         | 2263 (73.5)    |
| <b>Older sibling, n (%)</b>                                                   | 4680                                | 2648 (56.6)    | 3605                                             | 1813 (50.3)    | 1848                                         | 1017 (55.0)    |
| <b>Maternal smoking, n (%)</b>                                                |                                     |                |                                                  |                |                                              |                |
| During pregnancy                                                              | 2336                                | 147 (6.3)      | 2048                                             | 196 (9.6)      | 835                                          | 55 (6.6)       |
| During child's first 2 years                                                  | 6722                                | 1279 (19.0)    | 2294                                             | 379 (16.5)     | 3054                                         | 640 (20.1)     |
| <b>Paternal smoking, n (%)</b>                                                | 6395                                | 1402 (21.9)    | 3377                                             | 784 (23.2)     | 2871                                         | 654 (22.8)     |
| <b>Child exposed to smoke during first 2 years<sup>d</sup>, n (%)</b>         | 6776                                | 1965 (29.0)    | 2349                                             | 672 (28.6)     | 3077                                         | 940 (30.6)     |
| <b>Pets<sup>e</sup>, n (%)</b>                                                | 6802                                | 1408 (20.7)    | 3703                                             | 475 (12.8)     | 3094                                         | 651 (21.0)     |
| <b>Birth weight, gram, mean (SD)</b>                                          | 6703                                | 3585 (582)     | 2341                                             | 3570 (586)     | 3039                                         | 3590 (600)     |
| <b>Birth weight &lt;2500g, n (%)</b>                                          | 6703                                | 244 (3.6)      | 2341                                             | 95 (4.1)       | 3039                                         | 127 (4.2)      |
| <b>Sex, male, n (%)</b>                                                       | 6800                                | 3381 (49.7)    | 2800                                             | 1427 (51.0)    | 3092                                         | 1531 (49.5)    |
| <b>Lower respiratory tract infection within first year<sup>f</sup>, n (%)</b> | 3829                                | 411 (10.7)     | 1264                                             | 139 (11.0)     | 1475                                         | 169 (11.5)     |
| <b>Antibiotic treatment within first year, n (%)</b>                          | 4447                                | 919 (20.7)     | 2286                                             | 346 (15.1)     | 1738                                         | 360 (20.7)     |
| <b>Introduced to formula &lt;6 months of age, n (%)</b>                       | 6723                                | 1940 (28.9)    | 1562                                             | 640 (41.0)     | 3051                                         | 927 (30.4)     |

a: Participants which have provided at least one lifestyle questionnaire with characteristic information but have missing information on both breastfeeding duration and age at solid food introduction (n = 2339) or have provided no health questionnaire (n = 1364). See Figure 1.

b: Participants lost to follow up because of missing health questionnaire at six years of age.

c: The numbers vary because of missing data.

d: Yearly income in Norwegian kroner based on postcode.

e: Mother, father or common child with parental reported asthma, ARC or AD.

f: Parental or indoor smoking.

g: Reported cat, dog or other furry pets.

h: Pneumonia or bronchitis.

**Supplementary Table S3. Breastfeeding duration versus age at introduction of complementary foods**

| Duration of any breastfeeding | Age at introduction of complementary foods |            | Total |
|-------------------------------|--------------------------------------------|------------|-------|
|                               | ≥ 6 months                                 | < 6 months |       |
| ≥ 6 months                    | 933                                        | 2269       | 3202  |
| < 6 months                    | 60                                         | 546        | 606   |
| <b>Total</b>                  | 993                                        | 2815       | 3808  |

**Supplementary Table S4. Relation between breastfeeding duration and allergy related diseases when symptomatic children before six months of age are excluded**

| Disease and age          | Duration of any breastfeeding<br>(N = 6796) |            |                          |           | Odds ratio <sup>a</sup> (95 % CI) |                       |
|--------------------------|---------------------------------------------|------------|--------------------------|-----------|-----------------------------------|-----------------------|
|                          | ≥ 6 months<br>(n = 5695)                    |            | < 6 months<br>(n = 1101) |           | Crude                             | Adjusted <sup>c</sup> |
|                          | n <sup>b</sup>                              | n (%)      | n <sup>b</sup>           | n (%)     |                                   |                       |
| <b>Asthma</b>            |                                             |            |                          |           |                                   |                       |
| <b>2 years (ever)</b>    | 4365                                        | 204 (4.7)  | 801                      | 50 (6.2)  | 0.74 (0.54 - 1.01)                | 0.81 (0.57 - 1.15)    |
| <b>6 years (current)</b> | 2724                                        | 94 (3.5)   | 497                      | 19 (3.8)  | 0.89 (0.54 - 1.49)                | 0.97 (0.56 - 1.69)    |
| <b>ARC</b>               |                                             |            |                          |           |                                   |                       |
| <b>2 years (ever)</b>    | 4033                                        | 157 (3.9)  | 732                      | 55 (7.5)  | 0.50 (0.36 - 0.69)                | 0.61 (0.43 - 0.87)    |
| <b>6 years (ever)</b>    | 2541                                        | 241 (9.5)  | 458                      | 58 (12.7) | 0.72 (0.53 - 0.98)                | 0.72 (0.52 - 1.02)    |
| <b>Eczema</b>            |                                             |            |                          |           |                                   |                       |
| <b>2 years (ever)</b>    | 4255                                        | 437 (10.3) | 775                      | 72 (9.3)  | 1.12 (0.86 - 1.45)                | 1.18 (0.89 - 1.57)    |
| <b>6 years (current)</b> | 2686                                        | 279 (10.4) | 489                      | 43 (8.8)  | 1.20 (0.86 - 1.68)                | 1.31 (0.90 - 1.90)    |
| <b>6 years (ever)</b>    | 2670                                        | 383 (14.3) | 487                      | 61 (12.5) | 1.17 (0.88 - 1.56)                | 1.24 (0.91 - 1.71)    |

a: For duration of any breastfeeding for six months or more versus less than six months.

b: The numbers vary because of missing data.

c: Adjusted for sex, maternal age, mean income, first degree relative with allergy, maternal smoking during the child's first two years and birth weight.

**Supplementary Table S5. Relation between breastfeeding duration with maximum one year recall and allergy related diseases**

| Disease and age          | Duration of any breastfeeding<br>(N = 3859) |            |                         |            | Odds ratio <sup>a</sup> (95 % CI) |                       |
|--------------------------|---------------------------------------------|------------|-------------------------|------------|-----------------------------------|-----------------------|
|                          | ≥ 6 months<br>(n = 3196)                    |            | < 6 months<br>(n = 663) |            | Crude                             | Adjusted <sup>c</sup> |
|                          | n <sup>b</sup>                              | n (%)      | n <sup>b</sup>          | n (%)      |                                   |                       |
| <b>Asthma</b>            |                                             |            |                         |            |                                   |                       |
| <b>2 years (ever)</b>    | 2646                                        | 152 (5.7)  | 527                     | 41 (7.8)   | 0.72 (0.50 - 1.03)                | 0.84 (0.57 - 1.24)    |
| <b>6 years (current)</b> | 1981                                        | 91 (4.6)   | 383                     | 15 (3.9)   | 1.18 (0.68 - 2.06)                | 1.35 (0.74 - 2.49)    |
| <b>Wheeze</b>            |                                             |            |                         |            |                                   |                       |
| <b>2 years (ever)</b>    | 2564                                        | 619 (24.1) | 517                     | 147 (28.4) | 0.80 (0.65 - 0.99)                | 0.94 (0.74 - 1.18)    |
| <b>6 years (current)</b> | 1959                                        | 197 (10.1) | 382                     | 50 (13.1)  | 0.74 (0.53 - 1.03)                | 0.81 (0.56 - 1.16)    |
| <b>ARC</b>               |                                             |            |                         |            |                                   |                       |
| <b>2 years (ever)</b>    | 2422                                        | 129 (5.3)  | 484                     | 43 (8.9)   | 0.58 (0.40 - 0.83)                | 0.69 (0.46 - 1.02)    |
| <b>6 years (ever)</b>    | 1859                                        | 231 (12.4) | 356                     | 47 (13.2)  | 0.93 (0.67 - 1.31)                | 0.91 (0.63 - 1.31)    |
| <b>Eczema</b>            |                                             |            |                         |            |                                   |                       |
| <b>2 years (ever)</b>    | 2576                                        | 414 (16.1) | 510                     | 75 (14.7)  | 1.11 (0.85 - 1.45)                | 1.18 (0.89 - 1.58)    |
| <b>6 years (current)</b> | 1944                                        | 266 (13.7) | 377                     | 45 (11.9)  | 1.17 (0.83 - 1.64)                | 1.11 (0.78 - 1.59)    |
| <b>6 years (ever)</b>    | 1934                                        | 380 (19.7) | 376                     | 66 (17.6)  | 1.15 (0.86 - 1.53)                | 1.15 (0.84 - 1.56)    |

a: For duration of any breastfeeding for six months or more versus less than six months.

b: The numbers vary because of missing data.

c: Adjusted for sex, maternal age, mean income, first degree relative with allergy, maternal smoking during the child's first two years and birth weight.

**Supplementary Table S6. Interaction between duration of breastfeeding and supplementary with infant formula and allergy related diseases**

| Disease and age          | Duration of breastfeeding                                  |             |                                                              |            |                                            |            | Adjusted odds ratio (95 % CI)                                                                      |                                                                                                      |
|--------------------------|------------------------------------------------------------|-------------|--------------------------------------------------------------|------------|--------------------------------------------|------------|----------------------------------------------------------------------------------------------------|------------------------------------------------------------------------------------------------------|
|                          | ≥ 6 mo. breastfeeding without supplementation with formula |             | ≥ 6 mo. breastfeeding supplemented with some formula feeding |            | < 6 mo. breastfeeding formula before 6 mo. |            | ≥ 6 mo. breastfeeding without supplementation with formula vs less than 6 mo. of any breastfeeding | ≥ 6 mo. breastfeeding supplemented with some formula feeding vs less than 6 mo. of any breastfeeding |
|                          | n <sup>b</sup>                                             | n (%)       | n <sup>b</sup>                                               | n (%)      | n <sup>b</sup>                             | n (%)      |                                                                                                    |                                                                                                      |
| Asthma                   |                                                            |             |                                                              |            |                                            |            |                                                                                                    |                                                                                                      |
| <b>2 years (ever)</b>    | 4197                                                       | 262 (6.2)   | 877                                                          | 53 (6.0)   | 959                                        | 82 (8.6)   | 0.79 (0.59 - 1.05)                                                                                 | 0.74 (0.51 - 1.10)                                                                                   |
| <b>6 years (current)</b> | 2600                                                       | 121 (4.7)   | 506                                                          | 20 (4.0)   | 559                                        | 32 (5.7)   | 0.79 (0.51 - 1.23)                                                                                 | 0.70 (0.38 - 1.28)                                                                                   |
| Wheeze                   |                                                            |             |                                                              |            |                                            |            |                                                                                                    |                                                                                                      |
| <b>2 years (ever)</b>    | 4076                                                       | 1050 (25.8) | 850                                                          | 225 (26.5) | 934                                        | 284 (30.4) | 0.91 (0.77 - 1.09)                                                                                 | 0.94 (0.75 - 1.17)                                                                                   |
| <b>6 years (current)</b> | 2566                                                       | 265 (10.3)  | 504                                                          | 45 (8.9)   | 558                                        | 76 (13.6)  | 0.72 (0.53 - 0.97)                                                                                 | 0.63 (0.42 - 0.95)                                                                                   |
| ARC                      |                                                            |             |                                                              |            |                                            |            |                                                                                                    |                                                                                                      |
| <b>2 years (ever)</b>    | 3847                                                       | 209 (5.4)   | 790                                                          | 56 (7.1)   | 867                                        | 86 (9.9)   | 0.61 (0.46 - 0.82)                                                                                 | 0.78 (0.54 - 1.15)                                                                                   |
| <b>6 years (ever)</b>    | 2413                                                       | 275 (11.4)  | 473                                                          | 72 (15.2)  | 513                                        | 74 (14.4)  | 0.74 (0.55 - 1.01)                                                                                 | 1.04 (0.71 - 1.51)                                                                                   |
| Eczema                   |                                                            |             |                                                              |            |                                            |            |                                                                                                    |                                                                                                      |
| <b>2 years (ever)</b>    | 4087                                                       | 685 (16.8)  | 851                                                          | 160 (18.8) | 931                                        | 144 (15.6) | 1.13 (0.91 - 1.40)                                                                                 | 1.32 (1.02 - 1.73)                                                                                   |
| <b>6 years (current)</b> | 2558                                                       | 359 (14.0)  | 502                                                          | 75 (14.9)  | 550                                        | 69 (12.6)  | 1.12 (0.83 - 1.51)                                                                                 | 1.24 (0.85 - 1.79)                                                                                   |
| <b>6 years (ever)</b>    | 2543                                                       | 503 (19.8)  | 501                                                          | 107 (21.4) | 548                                        | 97 (17.7)  | 1.14 (0.88 - 1.48)                                                                                 | 1.29 (0.93 - 1.78)                                                                                   |

b: The numbers vary because of missing data.

c: Adjusted for sex, maternal age, mean income, first degree relative with allergy, maternal smoking during the child's first two years and birth weight.

**Supplementary Table S7. Relation between age at introduction to complementary foods and allergy related diseases when symptomatic children before six months of age are excluded**

| Disease and age          | Introduction to solid foods<br>(N = 3814) |           |                          |            | Odds ratio <sup>a</sup> (95 % CI) |                       |
|--------------------------|-------------------------------------------|-----------|--------------------------|------------|-----------------------------------|-----------------------|
|                          | ≥ 6 months<br>(n = 996)                   |           | < 6 months<br>(n = 2818) |            | Crude                             | Adjusted <sup>c</sup> |
|                          | n <sup>b</sup>                            | n (%)     | n <sup>b</sup>           | n (%)      |                                   |                       |
| <b>Asthma</b>            |                                           |           |                          |            |                                   |                       |
| <b>2 years (ever)</b>    | 718                                       | 31 (4.3)  | 1971                     | 91 (4.6)   | 0.93 (0.61 - 1.41)                | 0.98 (0.62 - 1.53)    |
| <b>6 years (current)</b> | 560                                       | 23 (4.11) | 1482                     | 47 (3.2)   | 1.31 (0.79 - 2.17)                | 1.56 (0.91 - 2.69)    |
| <b>ARC</b>               |                                           |           |                          |            |                                   |                       |
| <b>2 years (ever)</b>    | 668                                       | 21 (3.1)  | 1817                     | 82 (4.5)   | 0.69 (0.42 - 1.12)                | 0.78 (0.47 - 1.28)    |
| <b>6 years (ever)</b>    | 526                                       | 54 (10.3) | 1391                     | 134 (9.6)  | 1.07 (0.77 - 1.50)                | 1.24 (0.87 - 1.76)    |
| <b>Eczema</b>            |                                           |           |                          |            |                                   |                       |
| <b>2 years (ever)</b>    | 695                                       | 62 (8.9)  | 1926                     | 181 (9.4)  | 0.94 (0.70 - 1.28)                | 0.99 (0.72 - 1.36)    |
| <b>6 years (current)</b> | 548                                       | 43 (7.9)  | 1459                     | 147 (10.1) | 0.76 (0.53 - 1.08)                | 0.76 (0.53 - 1.11)    |
| <b>6 years (ever)</b>    | 546                                       | 60 (11.0) | 1450                     | 204 (14.1) | 0.75 (0.56 - 1.02)                | 0.76 (0.55 - 1.04)    |

a: For introduction to solid foods at six months or older versus younger than six months.

b: The numbers vary because of missing data.

c: Adjusted for sex, maternal age, mean income, first degree relative with allergy, maternal smoking during the child's first two years and birth weight.



**Supplementary Table S8. Relation between breastfeeding / complementary food introduction overlap and allergy related diseases**

| Disease and age          | Overlap<br>(N = 3485)    |            |                         |            | Odds ratio <sup>a</sup> (95 % CI) |                       |
|--------------------------|--------------------------|------------|-------------------------|------------|-----------------------------------|-----------------------|
|                          | ≥ 2 months<br>(n = 2837) |            | < 2 months<br>(n = 648) |            | Crude                             | Adjusted <sup>c</sup> |
|                          | n <sup>b</sup>           | n (%)      | n <sup>b</sup>          | n (%)      |                                   |                       |
| <b>Asthma</b>            |                          |            |                         |            |                                   |                       |
| <b>2 years (ever)</b>    | 2530                     | 145 (5.7)  | 529                     | 39 (7.4)   | 0.76 (0.53 - 1.10)                | 0.85 (0.57 - 1.25)    |
| <b>6 years (current)</b> | 1676                     | 77 (4.6)   | 377                     | 14 (3.7)   | 1.25 (0.70 - 2.23)                | 1.43 (0.76 - 2.70)    |
| <b>Wheeze</b>            |                          |            |                         |            |                                   |                       |
| <b>2 years (ever)</b>    | 2452                     | 603 (24.6) | 515                     | 133 (25.8) | 0.94 (0.75 - 1.16)                | 1.09 (0.86 - 1.38)    |
| <b>6 years (current)</b> | 1656                     | 164 (9.9)  | 377                     | 48 (12.7)  | 0.75 (0.53 - 1.06)                | 0.82 (0.56 - 1.18)    |
| <b>ARC</b>               |                          |            |                         |            |                                   |                       |
| <b>2 years (ever)</b>    | 2313                     | 127 (5.5)  | 489                     | 37 (7.6)   | 0.71 (0.49 - 1.04)                | 0.83 (0.55 - 1.24)    |
| <b>6 years (ever)</b>    | 1566                     | 198 (12.6) | 348                     | 49 (14.1)  | 0.88 (0.63 - 1.24)                | 0.87 (0.61 - 1.26)    |
| <b>Eczema</b>            |                          |            |                         |            |                                   |                       |
| <b>2 years (ever)</b>    | 2463                     | 397 (16.1) | 512                     | 75 (14.7)  | 1.12 (0.86 - 1.46)                | 1.17 (0.88 - 1.56)    |
| <b>6 years (current)</b> | 1645                     | 224 (13.6) | 370                     | 43 (11.6)  | 1.20 (0.85 - 1.70)                | 1.14 (0.79 - 1.64)    |
| <b>6 years (ever)</b>    | 1637                     | 323 (19.7) | 368                     | 65 (17.7)  | 1.15 (0.85 - 1.54)                | 1.14 (0.83 - 1.56)    |

a: For overlap between breastfeeding and introduction to solid foods for two months or more versus less than two months.

b: The numbers vary because of missing data.

c: Adjusted for sex, maternal age, mean income, first degree relative with allergy, maternal smoking during the child's first two years and birth weight.
